# Supplementary material for: Molecular signature of cell cycle exit induced in human T lymphoblasts by IL-2 withdrawal
Source: PubMed Central journal article supplement (PMC2706892; doi:10.1186/1471-2164-10-261), 2009-06-08
Supplement: 1471-2164-10-261-S1.pdf [file 1471-2164-10-261-S1.pdf]

Table A1. Genes differentiating between samples before and after IL-2 withdrawal identified by a non-paired sample T-test.

| Rank | Probe set    | Gene symbol | Gene Name                                                       | Fold-change | Parametric p-value | FDR <sup>1</sup> |
|------|--------------|-------------|-----------------------------------------------------------------|-------------|--------------------|------------------|
| 1    | 208893_s_at  | DUSP6       | dual specificity phosphatase 6                                  | 0.02        | 2.00E-07           | 0.003            |
| 2    | 1562612_at   | ME2         | malic enzyme 2, NAD(+)-dependent, mitochondrial                 | 1.47        | 3.00E-07           | 0.003            |
| 3    | 209193_at    | PIM1        | pim-1 oncogene                                                  | 0.20        | 7.00E-07           | 0.004            |
| 4    | 214637_at    | OSM         | oncostatin M                                                    | 0.05        | 1.30E-06           | 0.006            |
| 5    | 1555446_s_at | TMEM1       | transmembrane protein 1                                         | 2.04        | 2.00E-06           | 0.008            |
| 6    | 223377_x_at  | CISH        | cytokine inducible SH2-containing protein                       | 0.03        | 2.40E-06           | 0.008            |
| 7    | 221223_x_at  | CISH        | cytokine inducible SH2-containing protein                       | 0.04        | 2.80E-06           | 0.008            |
| 8    | 230170_at    | OSM         | oncostatin M                                                    | 0.02        | 3.90E-06           | 0.009            |
| 9    | 230161_at    | CD99        | CD99 molecule                                                   | 1.45        | 4.40E-06           | 0.009            |
| 10   | 208891_at    | DUSP6       | dual specificity phosphatase 6                                  | 0.03        | 4.70E-06           | 0.009            |
| 11   | 227599_at    | C3orf59     | chromosome 3 open reading frame 59                              | 0.17        | 5.50E-06           | 0.009            |
| 12   | 223961_s_at  | CISH        | cytokine inducible SH2-containing protein                       | 0.03        | 6.80E-06           | 0.010            |
| 13   | 226283_at    | WDR51B      | WD repeat domain 51B                                            | 0.39        | 7.10E-06           | 0.010            |
| 14   | 213702_x_at  | ASAH1       | N-acylsphingosine amidohydrolase (acid ceramidase) 1            | 1.59        | 1.80E-05           | 0.024            |
| 15   | 217165_x_at  | MT1F        | metallothionein 1F                                              | 3.80        | 1.94E-05           | 0.024            |
| 16   | 205266_at    | LIF         | leukemia inhibitory factor (cholinergic differentiation factor) | 0.03        | 2.09E-05           | 0.025            |
| 17   | 203373_at    | SOCS2       | suppressor of cytokine signaling 2                              | 0.04        | 2.61E-05           | 0.029            |
| 18   | 212310_at    | MIA3        | melanoma inhibitory activity family, member 3                   | 1.50        | 2.91E-05           | 0.030            |
| 19   | 207630_s_at  | CREM        | cAMP responsive element modulator                               | 0.35        | 3.26E-05           | 0.031            |
| 20   | 219681_s_at  | RAB11FIP1   | RAB11 family interacting protein 1 (class I)                    | 0.38        | 3.42E-05           | 0.031            |
| 21   | 1555878_at   | RPS24       | ribosomal protein S24                                           | 3.21        | 3.62E-05           | 0.031            |
| 22   | 203372_s_at  | SOCS2       | suppressor of cytokine signaling 2                              | 0.03        | 3.73E-05           | 0.031            |
| 23   | 208892_s_at  | DUSP6       | dual specificity phosphatase 6                                  | 0.02        | 3.86E-05           | 0.031            |
| 24   | 210001_s_at  | SOCS1       | suppressor of cytokine signaling 1                              | 0.19        | 4.58E-05           | 0.035            |
| 25   | 217047_s_at  | FAM13A1     | family with sequence similarity 13, member A1                   | 0.41        | 4.60E-05           | 0.035            |
| 26   | 201170_s_at  | BHLHB2      | basic helix-loop-helix domain containing, class B, 2            | 0.53        | 4.89E-05           | 0.035            |
| 27   | 238982_at    | DENR        | density-regulated protein                                       | 2.26        | 5.25E-05           | 0.036            |
| 28   | 230511_at    | CREM        | cAMP responsive element modulator                               | 0.26        | 7.60E-05           | 0.048            |
| 29   | 201041_s_at  | DUSP1       | dual specificity phosphatase 1                                  | 0.44        | 7.77E-05           | 0.048            |
| 30   | 209488_s_at  | RBPMS       | RNA binding protein with multiple splicing                      | 0.28        | 7.78E-05           | 0.048            |
| 31   | 214508_x_at  | CREM        | cAMP responsive element modulator                               | 0.30        | 7.86E-05           | 0.048            |
| 32   | 208091_s_at  | ECOP        | EGFR-coamplified and overexpressed protein                      | 1.69        | 9.50E-05           | 0.056            |
| 33   | 35254_at     | TRAFD1      | TRAF-type zinc finger domain containing 1                       | 0.66        | 9.82E-05           | 0.056            |

|    |              |              |                                                                                                |      |           |       |
|----|--------------|--------------|------------------------------------------------------------------------------------------------|------|-----------|-------|
| 34 | 231832_at    | GALNT4       | UDP-N-acetyl-alpha-D-galactosamine:polypeptide N-acetylgalactosaminyltransferase 4 (GalNAc-T4) | 0.47 | 0.000102  | 0.056 |
| 35 | 223059_s_at  | FAM107B      | family with sequence similarity 107, member B                                                  | 1.87 | 0.0001038 | 0.056 |
| 36 | 1557145_at   | STK38        | serine/threonine kinase 38                                                                     | 3.43 | 0.0001392 | 0.071 |
| 37 | 209498_at    | CEACAM1      | carcinoembryonic antigen-related cell adhesion molecule 1 (biliary glycoprotein)               | 0.10 | 0.0001397 | 0.071 |
| 38 | 201824_at    | RNF14        | ring finger protein 14                                                                         | 1.35 | 0.0001451 | 0.072 |
| 39 | 204881_s_at  | UGCG         | UDP-glucose ceramide glucosyltransferase                                                       | 0.46 | 0.0001543 | 0.074 |
| 40 | 223915_at    | BCOR         | BCL6 co-repressor                                                                              | 2.08 | 0.0001605 | 0.075 |
| 41 | 211506_s_at  | IL8          | interleukin 8                                                                                  | 0.10 | 0.00017   | 0.075 |
| 42 | 212590_at    | RRAS2        | related RAS viral (r-ras) oncogene homolog 2                                                   | 0.40 | 0.0001706 | 0.075 |
| 43 | 203821_at    | HBEGF        | heparin-binding EGF-like growth factor                                                         | 0.06 | 0.0001732 | 0.075 |
| 44 | 227583_at    | POP4         | processing of precursor 4, ribonuclease P/MRP subunit ( <i>S. cerevisiae</i> )                 | 2.18 | 0.0001824 | 0.075 |
| 45 | 213629_x_at  | MT1JP        | metallothionein 1J (pseudogene)                                                                | 5.25 | 0.0001837 | 0.075 |
| 46 | 226452_at    | PDK1         | pyruvate dehydrogenase kinase, isozyme 1                                                       | 0.39 | 0.000187  | 0.075 |
| 47 | 1555419_a_at | ASAH1        | N-acylsphingosine amidohydrolase (acid ceramidase) 1                                           | 1.81 | 0.0001878 | 0.075 |
| 48 | 201694_s_at  | EGR1         | early growth response 1                                                                        | 0.02 | 0.0001919 | 0.075 |
| 49 | 214757_at    | KIAA1505     | KIAA1505 protein                                                                               | 1.51 | 0.0001948 | 0.075 |
| 50 | 212225_at    | EIF1         | eukaryotic translation initiation factor 1                                                     | 0.26 | 0.0002062 | 0.077 |
| 51 | 207543_s_at  | P4HA1        | procollagen-proline, 2-oxoglutarate 4-dioxygenase (proline 4-hydroxylase), alpha polypeptide 1 | 0.19 | 0.0002232 | 0.080 |
| 52 | 202637_s_at  | ICAM1        | intercellular adhesion molecule 1 (CD54), human rhinovirus receptor                            | 0.42 | 0.0002319 | 0.080 |
| 53 | 213073_at    | ZFYVE26      | zinc finger, FYVE domain containing 26                                                         | 1.74 | 0.0002334 | 0.080 |
| 54 | 209967_s_at  | CREM         | cAMP responsive element modulator                                                              | 0.42 | 0.0002373 | 0.080 |
| 55 | 235926_at    | ANAPC5       | anaphase promoting complex subunit 5                                                           | 1.65 | 0.0002381 | 0.080 |
| 56 | 243819_at    | GNG2         | guanine nucleotide binding protein (G protein), gamma 2                                        | 0.25 | 0.0002388 | 0.080 |
| 57 | 48659_at     | RP5-1077B9.4 | invasion inhibitory protein 45                                                                 | 0.38 | 0.000247  | 0.081 |
| 58 | 223038_s_at  | FAM60A       | family with sequence similarity 60, member A                                                   | 0.68 | 0.0002518 | 0.081 |
| 59 | 211456_x_at  | MT1P2        | metallothionein 1 pseudogene 2                                                                 | 3.01 | 0.0002613 | 0.083 |
| 60 | 225557_at    | AXUD1        | AXIN1 up-regulated 1                                                                           | 0.32 | 0.0002659 | 0.083 |
| 61 | 227404_s_at  | EGR1         | early growth response 1                                                                        | 0.01 | 0.0002782 | 0.085 |
| 62 | 236280_at    | NA           | NA                                                                                             | 1.68 | 0.0002834 | 0.085 |
| 63 | 202973_x_at  | FAM13A1      | family with sequence similarity 13, member A1                                                  | 0.19 | 0.0002869 | 0.085 |
| 64 | 210845_s_at  | PLAUR        | plasminogen activator, urokinase receptor                                                      | 0.35 | 0.0002981 | 0.085 |
| 65 | 1559993_at   | SFXN3        | sideroflexin 3                                                                                 | 0.71 | 0.0003039 | 0.085 |
| 66 | 205227_at    | IL1RAP       | interleukin 1 receptor accessory protein                                                       | 0.54 | 0.0003057 | 0.085 |
| 67 | 210524_x_at  | NA           | NA                                                                                             | 3.82 | 0.0003073 | 0.085 |

|     |              |           |                                                                                    |      |           |       |
|-----|--------------|-----------|------------------------------------------------------------------------------------|------|-----------|-------|
| 68  | 201169_s_at  | BHLHB2    | basic helix-loop-helix domain containing, class B, 2                               | 0.47 | 0.0003079 | 0.085 |
| 69  | 218684_at    | LRRC8D    | leucine rich repeat containing 8 family, member D                                  | 1.72 | 0.0003179 | 0.086 |
| 70  | 235322_at    | NA        | NA                                                                                 | 1.99 | 0.0003245 | 0.087 |
| 71  | 210528_at    | MR1       | major histocompatibility complex, class I-related                                  | 1.47 | 0.0003341 | 0.088 |
| 72  | 206461_x_at  | MT1H      | metallothionein 1H                                                                 | 3.38 | 0.0003405 | 0.089 |
| 73  | 209007_s_at  | C1orf63   | chromosome 1 open reading frame 63                                                 | 1.69 | 0.0003458 | 0.089 |
| 74  | 231830_x_at  | RAB11FIP1 | RAB11 family interacting protein 1 (class I)                                       | 0.64 | 0.0003544 | 0.089 |
| 75  | 1565692_at   | CDR2      | cerebellar degeneration-related protein 2, 62kDa                                   | 2.17 | 0.0003581 | 0.089 |
| 76  | 204326_x_at  | MT1X      | metallothionein 1X                                                                 | 4.46 | 0.0003624 | 0.089 |
| 77  | 201471_s_at  | SQSTM1    | sequestosome 1                                                                     | 2.48 | 0.0003658 | 0.089 |
| 78  | 244803_at    | YY1AP1    | YY1 associated protein 1                                                           | 1.66 | 0.0003815 | 0.092 |
| 79  | 1555266_a_at | ASXL2     | additional sex combs like 2 (Drosophila)                                           | 1.59 | 0.0003924 | 0.093 |
| 80  | 223058_at    | FAM107B   | family with sequence similarity 107, member B                                      | 1.91 | 0.0004304 | 0.098 |
| 81  | 232614_at    | BCL2      | B-cell CLL/lymphoma 2                                                              | 0.15 | 0.0004309 | 0.098 |
| 82  | 203143_s_at  | KIAA0040  | KIAA0040                                                                           | 0.48 | 0.0004351 | 0.098 |
| 83  | 226370_at    | KLHL15    | kelch-like 15 (Drosophila)                                                         | 0.54 | 0.0004358 | 0.098 |
| 84  | 203958_s_at  | ZBTB40    | zinc finger and BTB domain containing 40                                           | 1.65 | 0.0004402 | 0.098 |
| 85  | 232210_at    | BCL2      | B-cell CLL/lymphoma 2                                                              | 0.09 | 0.0004529 | 0.100 |
| 86  | 206055_s_at  | SNRPA1    | small nuclear ribonucleoprotein polypeptide A@#\$\$%&                              | 0.62 | 0.0004727 | 0.101 |
| 87  | 1556715_at   | PRPSAP1   | phosphoribosyl pyrophosphate synthetase-associated protein 1                       | 1.38 | 0.000474  | 0.101 |
| 88  | 227847_at    | EPM2AIP1  | EPM2A (laforin) interacting protein 1                                              | 1.94 | 0.000476  | 0.101 |
| 89  | 213328_at    | NEK1      | NIMA (never in mitosis gene a)-related kinase 1                                    | 1.72 | 0.0004767 | 0.101 |
| 90  | 219128_at    | C2orf42   | chromosome 2 open reading frame 42                                                 | 1.64 | 0.0004846 | 0.101 |
| 91  | 229509_at    | MFSD8     | major facilitator superfamily domain containing 8                                  | 1.52 | 0.0004918 | 0.101 |
| 92  | 212833_at    | SLC25A46  | solute carrier family 25, member 46                                                | 1.58 | 0.0004997 | 0.101 |
| 93  | 231808_at    | LOC729082 | hypothetical protein LOC729082                                                     | 0.53 | 0.000503  | 0.101 |
| 94  | 228963_at    | NA        | NA                                                                                 | 1.53 | 0.0005196 | 0.101 |
| 95  | 38037_at     | HBEGF     | heparin-binding EGF-like growth factor                                             | 0.08 | 0.0005243 | 0.101 |
| 96  | 243999_at    | SLFN5     | schlafen family member 5                                                           | 1.69 | 0.0005248 | 0.101 |
| 97  | 226725_at    | SLFN5     | schlafen family member 5                                                           | 1.53 | 0.0005254 | 0.101 |
| 98  | 226831_at    | NA        | NA                                                                                 | 2.04 | 0.0005283 | 0.101 |
| 99  | 219255_x_at  | IL17RB    | interleukin 17 receptor B                                                          | 0.38 | 0.0005355 | 0.101 |
| 100 | 208456_s_at  | RRAS2     | related RAS viral (r-ras) oncogene homolog 2                                       | 0.36 | 0.0005412 | 0.101 |
| 101 | 223217_s_at  | NFKBIZ    | nuclear factor of kappa light polypeptide gene enhancer in B-cells inhibitor, zeta | 0.25 | 0.0005433 | 0.101 |
| 102 | 206999_at    | IL12RB2   | interleukin 12 receptor, beta 2                                                    | 0.49 | 0.0005495 | 0.101 |

|     |              |              |                                                                                                      |      |           |       |
|-----|--------------|--------------|------------------------------------------------------------------------------------------------------|------|-----------|-------|
| 103 | 201968_s_at  | PGM1         | phosphoglucomutase 1                                                                                 | 0.65 | 0.000563  | 0.102 |
| 104 | 218551_at    | RP5-1077B9.4 | invasion inhibitory protein 45                                                                       | 0.41 | 0.0005804 | 0.102 |
| 105 | 235522_at    | CLEC2D       | C-type lectin domain family 2, member D                                                              | 1.80 | 0.0005972 | 0.102 |
| 106 | 237747_at    | NA           | NA                                                                                                   | 3.20 | 0.0006008 | 0.102 |
| 107 | 224156_x_at  | IL17RB       | interleukin 17 receptor B                                                                            | 0.37 | 0.000601  | 0.102 |
| 108 | 202638_s_at  | ICAM1        | intercellular adhesion molecule 1 (CD54), human rhinovirus receptor                                  | 0.46 | 0.0006065 | 0.102 |
| 109 | 227262_at    | HAPLN3       | hyaluronan and proteoglycan link protein 3                                                           | 0.41 | 0.0006083 | 0.102 |
| 110 | 225558_at    | GIT2         | G protein-coupled receptor kinase interactor 2                                                       | 1.54 | 0.000612  | 0.102 |
| 111 | 212227_x_at  | EIF1         | eukaryotic translation initiation factor 1                                                           | 0.56 | 0.0006162 | 0.102 |
| 112 | 38069_at     | CLCN7        | chloride channel 7                                                                                   | 1.51 | 0.0006187 | 0.102 |
| 113 | 201855_s_at  | ASCIZ        | ATM/ATR-Substrate Chk2-Interacting Zn2+-finger protein                                               | 1.40 | 0.0006226 | 0.102 |
| 114 | 225059_at    | AGTRAP       | angiotensin II receptor-associated protein                                                           | 0.36 | 0.0006255 | 0.102 |
| 115 | 202859_x_at  | IL8          | interleukin 8                                                                                        | 0.15 | 0.0006309 | 0.102 |
| 116 | 242877_at    | LSM14A       | LSM14A, SCD6 homolog A ( <i>S. cerevisiae</i> )                                                      | 1.48 | 0.0006342 | 0.102 |
| 117 | 225262_at    | FOSL2        | FOS-like antigen 2                                                                                   | 0.17 | 0.0006368 | 0.102 |
| 118 | 241342_at    | TMEM65       | transmembrane protein 65                                                                             | 0.47 | 0.0006403 | 0.102 |
| 119 | 1555736_a_at | AGTRAP       | angiotensin II receptor-associated protein                                                           | 0.31 | 0.0006502 | 0.102 |
| 120 | 202021_x_at  | EIF1         | eukaryotic translation initiation factor 1                                                           | 0.57 | 0.0006502 | 0.102 |
| 121 | 241370_at    | LOC286052    | hypothetical protein LOC286052                                                                       | 0.41 | 0.0006652 | 0.103 |
| 122 | 228146_at    | C17orf51     | chromosome 17 open reading frame 51                                                                  | 0.55 | 0.0006708 | 0.103 |
| 123 | 213836_s_at  | WIPI1        | WD repeat domain, phosphoinositide interacting 1                                                     | 0.47 | 0.0006782 | 0.103 |
| 124 | 220305_at    | MGC3260      | hypothetical protein MGC3260                                                                         | 1.52 | 0.0006852 | 0.103 |
| 125 | 209006_s_at  | C1orf63      | chromosome 1 open reading frame 63                                                                   | 1.65 | 0.0006919 | 0.103 |
| 126 | 201014_s_at  | PAICS        | phosphoribosylaminoimidazole carboxylase, phosphoribosylaminoimidazole succinocarboxamide synthetase | 0.61 | 0.0006995 | 0.103 |
| 127 | 204798_at    | MYB          | v-myb myeloblastosis viral oncogene homolog (avian)                                                  | 1.96 | 0.0007067 | 0.103 |
| 128 | 209999_x_at  | SOCS1        | suppressor of cytokine signaling 1                                                                   | 0.14 | 0.0007122 | 0.103 |
| 129 | 208581_x_at  | MT1X         | metallothionein 1X                                                                                   | 3.73 | 0.0007149 | 0.103 |
| 130 | 207844_at    | IL13         | interleukin 13                                                                                       | 0.05 | 0.0007159 | 0.103 |
| 131 | 212760_at    | UBR2         | ubiquitin protein ligase E3 component n-recogin 2                                                    | 1.76 | 0.0007444 | 0.106 |
| 132 | 216336_x_at  | MT1M         | metallothionein 1M                                                                                   | 2.42 | 0.0007513 | 0.106 |
| 133 | 202951_at    | STK38        | serine/threonine kinase 38                                                                           | 1.65 | 0.000762  | 0.106 |
| 134 | 212130_x_at  | EIF1         | eukaryotic translation initiation factor 1                                                           | 0.56 | 0.00077   | 0.106 |
| 135 | 202822_at    | LPP          | LIM domain containing preferred translocation partner in lipoma                                      | 0.52 | 0.0007728 | 0.106 |
| 136 | 238880_at    | GTF3A        | general transcription factor IIIA                                                                    | 2.05 | 0.0007764 | 0.106 |
| 137 | 236172_at    | LTB4R        | leukotriene B4 receptor                                                                              | 0.46 | 0.0007825 | 0.106 |

|     |              |         |                                                                                                      |      |           |        |
|-----|--------------|---------|------------------------------------------------------------------------------------------------------|------|-----------|--------|
| 138 | 203502_at    | BPGM    | 2,3-bisphosphoglycerate mutase                                                                       | 0.40 | 0.0007902 | 0.106  |
| 139 | 203965_at    | USP20   | ubiquitin specific peptidase 20                                                                      | 1.46 | 0.0008024 | 0.106  |
| 140 | 228611_s_at  | NA      | NA                                                                                                   | 1.68 | 0.0008071 | 0.106  |
| 141 | 207339_s_at  | LTB     | lymphotoxin beta (TNF superfamily, member 3)                                                         | 0.54 | 0.0008146 | 0.106  |
| 142 | 238542_at    | ULBP2   | UL16 binding protein 2                                                                               | 0.43 | 0.0008155 | 0.106  |
| 143 | 209711_at    | SLC35D1 | solute carrier family 35 (UDP-glucuronic acid/UDP-N-acetylgalactosamine dual transporter), member D1 | 1.49 | 0.0008223 | 0.106  |
| 144 | 1553423_a_at | SLFN13  | schlafen family member 13                                                                            | 0.32 | 0.000824  | 0.106  |
| 145 | 1555827_at   | CCNL1   | cyclin L1                                                                                            | 0.40 | 0.0008276 | 0.106  |
| 146 | 212261_at    | TNRC15  | trinucleotide repeat containing 15                                                                   | 1.61 | 0.0008291 | 0.106  |
| 147 | 225251_at    | RAB24   | RAB24, member RAS oncogene family                                                                    | 0.69 | 0.0008339 | 0.106  |
| 148 | 202642_s_at  | TRRAP   | transformation/transcription domain-associated protein                                               | 1.66 | 0.0008476 | 0.107  |
| 149 | 209795_at    | CD69    | CD69 molecule                                                                                        | 0.06 | 0.0008486 | 0.1067 |
| 150 | 202081_at    | IER2    | immediate early response 2                                                                           | 0.43 | 0.0008665 | 0.108  |
| 151 | 1552423_at   | ETV3    | ets variant gene 3                                                                                   | 0.40 | 0.0008687 | 0.108  |
| 152 | 202932_at    | YES1    | v-yes-1 Yamaguchi sarcoma viral oncogene homolog 1                                                   | 0.50 | 0.0009064 | 0.111  |
| 153 | 231259_s_at  | CCND2   | cyclin D2                                                                                            | 0.29 | 0.0009079 | 0.111  |
| 154 | 244035_at    | BCL2    | B-cell CLL/lymphoma 2                                                                                | 0.16 | 0.0009198 | 0.112  |
| 155 | 210868_s_at  | ELOVL6  | ELOVL family member 6, elongation of long chain fatty acids (FEN1/Elo2, SUR4/Elo3-like, yeast)       | 0.14 | 0.0009252 | 0.112  |
| 156 | 235094_at    | TPM4    | tropomyosin 4                                                                                        | 0.34 | 0.0009351 | 0.113  |
| 157 | 1553101_a_at | ALKBH5  | alkB, alkylation repair homolog 5 (E. coli)                                                          | 0.72 | 0.0009486 | 0.113  |
| 158 | 201534_s_at  | UBL3    | ubiquitin-like 3                                                                                     | 1.62 | 0.0009961 | 0.118  |

Genes selected at the nominal univariate comparison level of 0.001.

<sup>1</sup>FDR – False Discovery Rate
