# Supplementary material for: Molecular signature of cell cycle exit induced in human T lymphoblasts by IL-2 withdrawal
Source: PubMed Central journal article supplement (PMC2706892; doi:10.1186/1471-2164-10-261), 2009-06-08
Supplement: 1471-2164-10-261-S2.pdf [file 1471-2164-10-261-S2.pdf]

Table A2. Genes differentiating between samples before and after IL-2 withdrawal identified by a non-paired sample T-test.

| Rank | Probe set    | Gene symbol | Gene Name                                                | Fold-change | Parametric p-value | FDR        |
|------|--------------|-------------|----------------------------------------------------------|-------------|--------------------|------------|
| 1    | 203414_at    | MMD         | monocyte to macrophage differentiation-associated        | 0.36        | 1.00E-06           | 0.019      |
| 2    | 223377_x_at  | CISH        | cytokine inducible SH2-containing protein                | 0.03        | 6.60E-06           | 0.059      |
| 3    | 223474_at    | C14orf4     | chromosome 14 open reading frame 4                       | 0.47        | 9.40E-06           | 0.059      |
| 4    | 211269_s_at  | IL2RA       | interleukin 2 receptor, alpha                            | 0.20        | 1.32E-05           | 0.062      |
| 5    | 227697_at    | SOCS3       | suppressor of cytokine signaling 3                       | 0.05        | 1.72E-05           | 0.065      |
| 6    | 208893_s_at  | DUSP6       | dual specificity phosphatase 6                           | 0.02        | 2.63E-05           | 0.066      |
| 7    | 1555446_s_at | TMEM1       | transmembrane protein 1                                  | 2.04        | 2.70E-05           | 0.066      |
| 8    | 38269_at     | PRKD2       | protein kinase D2                                        | 0.62        | 2.80E-05           | 0.066      |
| 9    | 209193_at    | PIM1        | pim-1 oncogene                                           | 0.20        | 3.17E-05           | 0.066      |
| 10   | 227599_at    | C3orf59     | chromosome 3 open reading frame 59                       | 0.17        | 3.55E-05           | 0.067      |
| 11   | 221223_x_at  | CISH        | cytokine inducible SH2-containing protein                | 0.03        | 4.20E-05           | 0.068      |
| 12   | 211375_s_at  | ILF3        | interleukin enhancer binding factor 3, 90kDa             | 0.84        | 4.90E-05           | 0.068<br>6 |
| 13   | 227718_at    | PURB        | purine-rich element binding protein B                    | 0.58        | 4.97E-05           | 0.068      |
| 14   | 200894_s_at  | FKBP4       | FK506 binding protein 4, 59kDa                           | 0.71        | 5.48E-05           | 0.068      |
| 15   | 224785_at    | FAM100B     | family with sequence similarity 100, member B            | 0.46        | 5.50E-05           | 0.068      |
| 16   | 228604_at    | NA          | NA                                                       | 1.39        | 6.14E-05           | 0.068      |
| 17   | 213702_x_at  | ASAHI       | N-acylsphingosine amidohydrolase (acid ceramidase) 1     | 1.59        | 6.60E-05           | 0.068      |
| 18   | 223961_s_at  | CISH        | cytokine inducible SH2-containing protein                | 0.03        | 6.62E-05           | 0.068      |
| 19   | 207844_at    | IL13        | interleukin 13                                           | 0.05        | 6.86E-05           | 0.068      |
| 20   | 1562612_at   | ME2         | malic enzyme 2, NAD(+)-dependent, mitochondrial          | 1.47        | 9.01E-05           | 0.073      |
| 21   | 201170_s_at  | BHLHB2      | basic helix-loop-helix domain containing, class B, 2     | 0.53        | 9.24E-05           | 0.074      |
| 22   | 229442_at    | C18orf54    | chromosome 18 open reading frame 54                      | 1.43        | 9.68E-05           | 0.074      |
| 23   | 213153_at    | SETD1B      | SET domain containing 1B                                 | 1.65        | 0.0001027          | 0.074      |
| 24   | 224963_at    | SLC26A2     | solute carrier family 26 (sulfate transporter), member 2 | 1.81        | 0.0001123          | 0.074      |

|    |              |          |                                                                        |      |           |       |
|----|--------------|----------|------------------------------------------------------------------------|------|-----------|-------|
| 25 | 223092_at    | ANKH     | ankylosis, progressive homolog (mouse)                                 | 1.67 | 0.000114  | 0.074 |
| 26 | 203685_at    | BCL2     | B-cell CLL/lymphoma 2                                                  | 0.16 | 0.0001192 | 0.074 |
| 27 | 226905_at    | FAM101B  | family with sequence similarity 101, member B                          | 0.44 | 0.000124  | 0.074 |
| 28 | 230127_at    | NA       | NA                                                                     | 0.35 | 0.0001299 | 0.074 |
| 29 | 236008_at    | C9orf73  | chromosome 9 open reading frame 73                                     | 0.25 | 0.000131  | 0.074 |
| 30 | 1555766_a_at | GNG2     | guanine nucleotide binding protein (G protein), gamma 2                | 0.41 | 0.0001332 | 0.074 |
| 31 | 203373_at    | SOCS2    | suppressor of cytokine signaling 2                                     | 0.04 | 0.0001365 | 0.074 |
| 32 | 224314_s_at  | EGLN1    | egl nine homolog 1 (C. elegans)                                        | 0.43 | 0.0001386 | 0.074 |
| 33 | 239328_at    | RCS1     | RCS1 domain containing 1                                               | 1.43 | 0.0001487 | 0.074 |
| 34 | 203372_s_at  | SOCS2    | suppressor of cytokine signaling 2                                     | 0.03 | 0.00015   | 0.074 |
| 35 | 220252_x_at  | CXorf21  | chromosome X open reading frame 21                                     | 1.85 | 0.0001504 | 0.074 |
| 36 | 209017_s_at  | LONP1    | lon peptidase 1, mitochondrial                                         | 0.64 | 0.0001535 | 0.074 |
| 37 | 209626_s_at  | OSBPL3   | oxysterol binding protein-like 3                                       | 0.71 | 0.0001581 | 0.074 |
| 38 | 218324_s_at  | SPATS2   | spermatogenesis associated, serine-rich 2                              | 0.71 | 0.0001629 | 0.074 |
| 39 | 1559964_at   | FLJ38717 | FLJ38717 protein                                                       | 2.00 | 0.0001656 | 0.074 |
| 40 | 218224_at    | PNMA1    | paraneoplastic antigen MA1                                             | 1.82 | 0.000167  | 0.074 |
| 41 | 229001_at    | PPP1R3E  | protein phosphatase 1, regulatory (inhibitor) subunit 3E               | 1.93 | 0.0001707 | 0.074 |
| 42 | 202855_s_at  | SLC16A3  | solute carrier family 16, member 3 (monocarboxylic acid transporter 4) | 0.27 | 0.0001716 | 0.074 |
| 43 | 214637_at    | OSM      | oncostatin M                                                           | 0.05 | 0.0001724 | 0.074 |
| 44 | 210976_s_at  | PFKM     | phosphofructokinase, muscle                                            | 0.76 | 0.0001767 | 0.074 |
| 45 | 201471_s_at  | SQSTM1   | sequestosome 1                                                         | 2.48 | 0.0001798 | 0.074 |
| 46 | 224799_at    | NDFIP2   | Nedd4 family interacting protein 2                                     | 0.36 | 0.0001849 | 0.074 |
| 47 | 203853_s_at  | GAB2     | GRB2-associated binding protein 2                                      | 0.28 | 0.000186  | 0.074 |
| 48 | 219221_at    | ZBTB38   | zinc finger and BTB domain containing 38                               | 1.48 | 0.000188  | 0.074 |
| 49 | 212590_at    | RRAS2    | related RAS viral (r-ras) oncogene homolog 2                           | 0.40 | 0.000192  | 0.074 |
| 50 | 230170_at    | OSM      | oncostatin M                                                           | 0.02 | 0.0001964 | 0.074 |
| 51 | 203904_x_at  | CD82     | CD82 molecule                                                          | 1.44 | 0.0002114 | 0.076 |
| 52 | 229194_at    | PCGF5    | polycomb group ring finger 5                                           | 0.61 | 0.0002116 | 0.076 |
| 53 | 244803_at    | YY1AP1   | YY1 associated protein 1                                               | 1.66 | 0.0002194 | 0.076 |
| 54 | 206999_at    | IL12RB2  | interleukin 12 receptor, beta 2                                        | 0.49 | 0.000222  | 0.077 |

|    |              |           |                                                                              |      |           |       |
|----|--------------|-----------|------------------------------------------------------------------------------|------|-----------|-------|
| 55 | 201037_at    | PFKP      | phosphofructokinase, platelet                                                | 0.53 | 0.0002329 | 0.077 |
| 56 | 207339_s_at  | LTB       | lymphotoxin beta (TNF superfamily, member 3)                                 | 0.54 | 0.0002407 | 0.077 |
| 57 | 209457_at    | DUSP5     | dual specificity phosphatase 5                                               | 0.33 | 0.0002426 | 0.077 |
| 58 | 208891_at    | DUSP6     | dual specificity phosphatase 6                                               | 0.03 | 0.0002431 | 0.077 |
| 59 | 201925_s_at  | CD55      | CD55 molecule, decay accelerating factor for complement (Cromer blood group) | 0.53 | 0.0002461 | 0.077 |
| 60 | 213737_x_at  | GOLGA8G   | golgi autoantigen, golgin subfamily a, 8G                                    | 0.50 | 0.0002509 | 0.077 |
| 61 | 1553101_a_at | ALKBH5    | alkB, alkylation repair homolog 5 (E. coli)                                  | 0.72 | 0.0002511 | 0.077 |
| 62 | 211506_s_at  | IL8       | interleukin 8                                                                | 0.10 | 0.0002539 | 0.077 |
| 63 | 204629_at    | PARVB     | parvin, beta                                                                 | 0.68 | 0.0002665 | 0.078 |
| 64 | 226876_at    | FAM101B   | family with sequence similarity 101, member B                                | 0.47 | 0.0002679 | 0.078 |
| 65 | 217916_s_at  | FAM49B    | family with sequence similarity 49, member B                                 | 0.71 | 0.0002689 | 0.078 |
| 66 | 1555878_at   | RPS24     | ribosomal protein S24                                                        | 3.21 | 0.0002756 | 0.078 |
| 67 | 235875_at    | SLC1A4    | solute carrier family 1 (glutamate/neutral amino acid transporter), member 4 | 2.55 | 0.0002781 | 0.078 |
| 68 | 214487_s_at  | RAP2B     | RAP2B, member of RAS oncogene family                                         | 0.76 | 0.0002874 | 0.079 |
| 69 | 226671_at    | LAMP2     | lysosomal-associated membrane protein 2                                      | 2.02 | 0.0002944 | 0.080 |
| 70 | 227087_at    | NA        | NA                                                                           | 0.81 | 0.0003066 | 0.080 |
| 71 | 227395_at    | NA        | NA                                                                           | 1.59 | 0.0003107 | 0.080 |
| 72 | 225763_at    | RCSD1     | RCSD domain containing 1                                                     | 1.42 | 0.0003123 | 0.080 |
| 73 | 204131_s_at  | FOXO3     | forkhead box O3                                                              | 1.39 | 0.0003137 | 0.080 |
| 74 | 227796_at    | LOC643836 | similar to Zinc finger protein 62 homolog (Zfp-62) (ZT3)                     | 1.41 | 0.0003173 | 0.080 |
| 75 | 208748_s_at  | FLOT1     | flotillin 1                                                                  | 0.33 | 0.0003181 | 0.080 |
| 76 | 205266_at    | LIF       | leukemia inhibitory factor (cholinergic differentiation factor)              | 0.04 | 0.0003243 | 0.080 |
| 77 | 221029_s_at  | WNT5B     | wingless-type MMTV integration site family, member 5B                        | 2.97 | 0.0003366 | 0.082 |
| 78 | 210891_s_at  | GTF2I     | general transcription factor II, i                                           | 1.37 | 0.0003513 | 0.083 |
| 79 | 219681_s_at  | RAB11FIP1 | RAB11 family interacting protein 1 (class I)                                 | 0.38 | 0.0003519 | 0.083 |
| 80 | 209467_s_at  | MKNK1     | MAP kinase interacting serine/threonine kinase 1                             | 0.57 | 0.0003594 | 0.083 |
| 81 | 225262_at    | FOSL2     | FOS-like antigen 2                                                           | 0.17 | 0.0003595 | 0.083 |

|     |             |               |                                                      |      |           |       |
|-----|-------------|---------------|------------------------------------------------------|------|-----------|-------|
| 82  | 226831_at   | NA            | NA                                                   | 2.04 | 0.0003735 | 0.085 |
| 83  | 218551_at   | RP5-1077B9.4  | invasion inhibitory protein 45                       | 0.41 | 0.0003769 | 0.085 |
| 84  | 203821_at   | HBEGF         | heparin-binding EGF-like growth factor               | 0.06 | 0.0003795 | 0.085 |
| 85  | 218000_s_at | PHLDA1        | pleckstrin homology-like domain, family A, member 1  | 0.27 | 0.0003889 | 0.086 |
| 86  | 210845_s_at | PLAUR         | plasminogen activator, urokinase receptor            | 0.36 | 0.0003995 | 0.087 |
| 87  | 226031_at   | CCDC132       | coiled-coil domain containing 132                    | 1.41 | 0.0004045 | 0.087 |
| 88  | 226283_at   | WDR51B        | WD repeat domain 51B                                 | 0.39 | 0.000407  | 0.087 |
| 89  | 219255_x_at | IL17RB        | interleukin 17 receptor B                            | 0.38 | 0.0004158 | 0.087 |
| 90  | 213112_s_at | SQSTM1        | sequestosome 1                                       | 2.50 | 0.0004188 | 0.087 |
| 91  | 210980_s_at | ASAH1         | N-acylsphingosine amidohydrolase (acid ceramidase) 1 | 1.61 | 0.0004323 | 0.089 |
| 92  | 217997_at   | PHLDA1        | pleckstrin homology-like domain, family A, member 1  | 0.27 | 0.0004497 | 0.092 |
| 93  | 213189_at   | DKFZp667G2110 | hypothetical protein DKFZp667G2110                   | 0.53 | 0.0004548 | 0.092 |
| 94  | 205423_at   | AP1B1         | adaptor-related protein complex 1, beta 1 subunit    | 0.81 | 0.0004681 | 0.093 |
| 95  | 227262_at   | HAPLN3        | hyaluronan and proteoglycan link protein 3           | 0.41 | 0.0004794 | 0.095 |
| 96  | 214334_x_at | DAZAP2        | DAZ associated protein 2                             | 1.26 | 0.0004975 | 0.096 |
| 97  | 206055_s_at | SNRPA1        | small nuclear ribonucleoprotein polypeptide A@#%&    | 0.62 | 0.0005028 | 0.096 |
| 98  | 240013_at   | NA            | NA                                                   | 0.23 | 0.0005043 | 0.096 |
| 99  | 226850_at   | SUMF1         | sulfatase modifying factor 1                         | 2.11 | 0.0005074 | 0.096 |
| 100 | 201041_s_at | DUSP1         | dual specificity phosphatase 1                       | 0.44 | 0.0005101 | 0.096 |
| 101 | 230161_at   | CD99          | CD99 molecule                                        | 1.45 | 0.0005177 | 0.096 |
| 102 | 202081_at   | IER2          | immediate early response 2                           | 0.43 | 0.0005259 | 0.096 |
| 103 | 217996_at   | PHLDA1        | pleckstrin homology-like domain, family A, member 1  | 0.25 | 0.0005261 | 0.096 |
| 104 | 212217_at   | PREPL         | prolyl endopeptidase-like                            | 1.31 | 0.000537  | 0.097 |
| 105 | 225176_at   | LNPEP         | leucyl/cystinyl aminopeptidase                       | 1.44 | 0.0005488 | 0.098 |
| 106 | 209006_s_at | C1orf63       | chromosome 1 open reading frame 63                   | 1.65 | 0.0005551 | 0.098 |
| 107 | 212833_at   | SLC25A46      | solute carrier family 25, member 46                  | 1.58 | 0.0005657 | 0.099 |
| 108 | 208091_s_at | ECOP          | EGFR-coamplified and overexpressed protein           | 1.69 | 0.0005782 | 0.099 |
| 109 | 228828_at   | RNF43         | ring finger protein 43                               | 1.86 | 0.0005841 | 0.099 |
| 110 | 201968_s_at | PGM1          | phosphoglucomutase 1                                 | 0.65 | 0.00059   | 0.099 |

|     |             |          |                                                                              |      |           |       |
|-----|-------------|----------|------------------------------------------------------------------------------|------|-----------|-------|
| 111 | 209340_at   | UAP1     | UDP-N-acetylglucosamine pyrophosphorylase 1                                  | 0.82 | 0.000592  | 0.099 |
| 112 | 209390_at   | TSC1     | tuberous sclerosis 1                                                         | 1.59 | 0.0005978 | 0.099 |
| 113 | 201926_s_at | CD55     | CD55 molecule, decay accelerating factor for complement (Cromer blood group) | 0.65 | 0.0005982 | 0.099 |
| 114 | 204070_at   | RARRES3  | retinoic acid receptor responder (tazarotene induced) 3                      | 1.81 | 0.0006093 | 0.099 |
| 115 | 223210_at   | CHURC1   | churchill domain containing 1                                                | 1.35 | 0.00061   | 0.099 |
| 116 | 236921_at   | EMB      | embigin homolog (mouse)                                                      | 3.49 | 0.0006115 | 0.099 |
| 117 | 203865_s_at | ADARB1   | adenosine deaminase, RNA-specific, B1 (RED1 homolog rat)                     | 0.45 | 0.00067   | 0.106 |
| 118 | 214508_x_at | CREM     | cAMP responsive element modulator                                            | 0.30 | 0.0006719 | 0.106 |
| 119 | 218684_at   | LRRC8D   | leucine rich repeat containing 8 family, member D                            | 1.72 | 0.0006737 | 0.106 |
| 120 | 208749_x_at | FLOT1    | flotillin 1                                                                  | 0.34 | 0.0006873 | 0.106 |
| 121 | 228146_at   | C17orf51 | chromosome 17 open reading frame 51                                          | 0.55 | 0.0007012 | 0.106 |
| 122 | 229670_at   | NA       | NA                                                                           | 1.98 | 0.0007024 | 0.106 |
| 123 | 208997_s_at | UCP2     | uncoupling protein 2 (mitochondrial, proton carrier)                         | 1.23 | 0.0007152 | 0.106 |
| 124 | 213138_at   | ARID5A   | AT rich interactive domain 5A (MRF1-like)                                    | 0.35 | 0.000716  | 0.106 |
| 125 | 209488_s_at | BPMS     | RNA binding protein with multiple splicing                                   | 0.28 | 0.0007178 | 0.106 |
| 126 | 225457_s_at | LOC25845 | hypothetical LOC25845                                                        | 0.74 | 0.0007193 | 0.106 |
| 127 | 217999_s_at | PHLDA1   | pleckstrin homology-like domain, family A, member 1                          | 0.20 | 0.0007212 | 0.106 |
| 128 | 212310_at   | MIA3     | melanoma inhibitory activity family, member 3                                | 1.50 | 0.0007293 | 0.106 |
| 129 | 224156_x_at | IL17RB   | interleukin 17 receptor B                                                    | 0.37 | 0.0007308 | 0.106 |
| 130 | 216060_s_at | DAAM1    | dishevelled associated activator of morphogenesis 1                          | 1.84 | 0.0007412 | 0.107 |
| 131 | 221059_s_at | CHST6    | carbohydrate (N-acetylglucosamine 6-O) sulfotransferase 6                    | 1.31 | 0.0007507 | 0.107 |
| 132 | 244035_at   | BCL2     | B-cell CLL/lymphoma 2                                                        | 0.16 | 0.0007528 | 0.107 |
| 133 | 238295_at   | C17orf42 | chromosome 17 open reading frame 42                                          | 2.01 | 0.0007575 | 0.107 |
| 134 | 229021_at   | NA       | NA                                                                           | 0.70 | 0.000769  | 0.108 |
| 135 | 224686_x_at | LRRC37A2 | leucine rich repeat containing 37, member A2                                 | 1.48 | 0.0007839 | 0.108 |
| 136 | 202932_at   | YES1     | v-yes-1 Yamaguchi sarcoma viral oncogene homolog 1                           | 0.50 | 0.0007845 | 0.108 |

|     |              |               |                                                                                       |      |           |       |
|-----|--------------|---------------|---------------------------------------------------------------------------------------|------|-----------|-------|
| 137 | 202377_at    | NA            | NA                                                                                    | 0.63 | 0.0007875 | 0.108 |
| 138 | 230108_at    | PGBD3         | piggyBac transposable element derived 3                                               | 1.65 | 0.0008055 | 0.108 |
| 139 | 218352_at    | RCBTB1        | regulator of chromosome condensation (RCC1) and BTB (POZ) domain containing protein 1 | 1.27 | 0.0008082 | 0.108 |
| 140 | 201945_at    | FURIN         | furin (paired basic amino acid cleaving enzyme)                                       | 0.42 | 0.0008085 | 0.108 |
| 141 | 212741_at    | MAOA          | monoamine oxidase A                                                                   | 0.41 | 0.000813  | 0.108 |
| 142 | 218242_s_at  | SUV420H1      | suppressor of variegation 4-20 homolog 1 (Drosophila)                                 | 1.40 | 0.0008187 | 0.108 |
| 143 | 223217_s_at  | NFKBIZ        | nuclear factor of kappa light polypeptide gene enhancer in B-cells inhibitor, zeta    | 0.25 | 0.000844  | 0.110 |
| 144 | 215388_s_at  | CFHR1         | complement factor H-related 1                                                         | 0.32 | 0.0008479 | 0.110 |
| 145 | 214030_at    | DKFZp667G2110 | hypothetical protein DKFZp667G2110                                                    | 0.48 | 0.0008561 | 0.110 |
| 146 | 226981_at    | MLL           | myeloid/lymphoid or mixed-lineage leukemia (trithorax homolog, Drosophila)            | 1.59 | 0.000867  | 0.110 |
| 147 | 227701_at    | C10orf118     | chromosome 10 open reading frame 118                                                  | 1.61 | 0.0008775 | 0.110 |
| 148 | 213766_x_at  | GNA11         | guanine nucleotide binding protein (G protein), alpha 11 (Gq class)                   | 0.53 | 0.0008794 | 0.110 |
| 149 | 235424_at    | NA            | NA                                                                                    | 1.70 | 0.0008808 | 0.110 |
| 150 | 207113_s_at  | TNF           | tumor necrosis factor (TNF superfamily, member 2)                                     | 0.09 | 0.0008842 | 0.110 |
| 151 | 217967_s_at  | FAM129A       | family with sequence similarity 129, member A                                         | 1.35 | 0.0008887 | 0.110 |
| 152 | 202149_at    | NEDD9         | neural precursor cell expressed, developmentally down-regulated 9                     | 0.41 | 0.0008984 | 0.110 |
| 153 | 222907_x_at  | TMEM50B       | transmembrane protein 50B                                                             | 1.74 | 0.0008997 | 0.110 |
| 154 | 1558747_at   | SMCHD1        | structural maintenance of chromosomes flexible hinge domain containing 1              | 1.12 | 0.0009019 | 0.110 |
| 155 | 214579_at    | NPAL3         | NIPA-like domain containing 3                                                         | 1.35 | 0.0009054 | 0.110 |
| 156 | 1553117_a_at | STK38         | serine/threonine kinase 38                                                            | 2.03 | 0.0009219 | 0.110 |
| 157 | 226914_at    | ARPC5L        | actin related protein 2/3 complex, subunit 5-like                                     | 0.49 | 0.0009226 | 0.110 |
| 158 | 202859_x_at  | IL8           | interleukin 8                                                                         | 0.15 | 0.0009375 | 0.111 |
| 159 | 201417_at    | SOX4          | SRY (sex determining region Y)-box 4                                                  | 3.49 | 0.0009393 | 0.111 |
| 160 | 226963_at    | BTF3L4        | basic transcription factor 3-like 4                                                   | 0.74 | 0.0009503 | 0.111 |

|     |             |         |                                                                              |      |           |       |
|-----|-------------|---------|------------------------------------------------------------------------------|------|-----------|-------|
| 161 | 207163_s_at | AKT1    | v-akt murine thymoma viral oncogene homolog 1                                | 0.67 | 0.0009578 | 0.112 |
| 162 | 219073_s_at | OSBPL10 | oxysterol binding protein-like 10                                            | 0.52 | 0.0009665 | 0.112 |
| 163 | 204373_s_at | CEP350  | centrosomal protein 350kDa                                                   | 1.26 | 0.0009785 | 0.112 |
| 164 | 208892_s_at | DUSP6   | dual specificity phosphatase 6                                               | 0.02 | 0.0009803 | 0.112 |
| 165 | 224989_at   | NA      | NA                                                                           | 2.47 | 0.0009863 | 0.112 |
| 166 | 210164_at   | GZMB    | granzyme B (granzyme 2, cytotoxic T-lymphocyte-associated serine esterase 1) | 0.60 | 0.0009974 | 0.113 |

---

Genes selected at the nominal univariate comparison level of 0.001.
