# Supplementary material for: Molecular signature of cell cycle exit induced in human T lymphoblasts by IL-2 withdrawal
Source: PubMed Central journal article supplement (PMC2706892; doi:10.1186/1471-2164-10-261), 2009-06-08
Supplement: 1471-2164-10-261-S3.pdf [file 1471-2164-10-261-S3.pdf]

Table A3. Gene Ontology (GO) analysis of genes selected in a non-paired sample comparison between IL-2-deprived and non-deprived lymphocytes (see Additional file 1).

| <b>Cellular Component</b> |                                                                        |                                        |                                        |                          |
|---------------------------|------------------------------------------------------------------------|----------------------------------------|----------------------------------------|--------------------------|
| <b>GO ID</b>              | <b>GO Term</b>                                                         | <b>Observed in the selected subset</b> | <b>Expected in the selected subset</b> | <b>Observed/Expected</b> |
| GO:0009986                | cell surface                                                           | 5                                      | 0.74                                   | 6.74                     |
| GO:0005615                | extracellular space                                                    | 7                                      | 1.74                                   | 4.02                     |
| GO:0005768                | endosome                                                               | 5                                      | 1.51                                   | 3.32                     |
| GO:0044421                | extracellular region part                                              | 8                                      | 2.92                                   | 2.74                     |
| <b>Molecular Function</b> |                                                                        |                                        |                                        |                          |
| <b>GO ID</b>              | <b>GO Term</b>                                                         | <b>Observed in the selected subset</b> | <b>Expected in the selected subset</b> | <b>Observed/Expected</b> |
| GO:0016868                | intramolecular transferase activity, phosphotransferases               | 5                                      | 0.11                                   | 43.89                    |
| GO:0005126                | hematopoietin/interferon-class (D200-domain) cytokine receptor binding | 6                                      | 0.23                                   | 26.33                    |
| GO:0016866                | intramolecular transferase activity                                    | 5                                      | 0.25                                   | 19.75                    |
| GO:0030246                | carbohydrate binding                                                   | 5                                      | 1.16                                   | 4.29                     |
| GO:0016853                | isomerase activity                                                     | 7                                      | 2.13                                   | 3.29                     |
| GO:0016881                | acid-amino acid ligase activity                                        | 5                                      | 1.7                                    | 2.95                     |
| GO:0019899                | enzyme binding                                                         | 6                                      | 2.33                                   | 2.58                     |
| GO:0004721                | phosphoprotein phosphatase activity                                    | 5                                      | 2.04                                   | 2.45                     |
| <b>Biological Process</b> |                                                                        |                                        |                                        |                          |
| <b>GO ID</b>              | <b>GO Term</b>                                                         | <b>Observed in the selected subset</b> | <b>Expected in the selected subset</b> | <b>Observed/Expected</b> |
| GO:0007259                | JAK-STAT cascade                                                       | 8                                      | 0.48                                   | 16.68                    |
| GO:0009968                | negative regulation of signal transduction                             | 6                                      | 0.88                                   | 6.84                     |
| GO:0018193                | peptidyl-amino acid modification                                       | 5                                      | 1.01                                   | 4.93                     |
| GO:0001558                | regulation of cell growth                                              | 5                                      | 1.07                                   | 4.68                     |
| GO:0040008                | regulation of growth                                                   | 5                                      | 1.32                                   | 3.8                      |
| GO:0016049                | cell growth                                                            | 5                                      | 1.38                                   | 3.61                     |
| GO:0008361                | regulation of cell size                                                | 5                                      | 1.38                                   | 3.61                     |
| GO:0051674                | localization of cell                                                   | 9                                      | 2.88                                   | 3.13                     |
| GO:0006928                | cell motility                                                          | 9                                      | 2.88                                   | 3.13                     |
| GO:0007610                | behavior                                                               | 5                                      | 1.71                                   | 2.92                     |
| GO:0040007                | growth                                                                 | 5                                      | 1.82                                   | 2.74                     |
| GO:0042221                | response to chemical stimulus                                          | 9                                      | 3.44                                   | 2.62                     |
| GO:0007267                | cell-cell signaling                                                    | 7                                      | 2.93                                   | 2.39                     |

The number of genes changed in each category was compared with the number of expected occurrences. Only GO classes and parent classes with at least 5 observations in the selected subset and with an 'observed vs. expected' ratio of at least 2 were shown.
