# Supplementary material for: Molecular signature of cell cycle exit induced in human T lymphoblasts by IL-2 withdrawal
Source: PubMed Central journal article supplement (PMC2706892; doi:10.1186/1471-2164-10-261), 2009-06-08
Supplement: 1471-2164-10-261-S4.pdf [file 1471-2164-10-261-S4.pdf]

Table A4. Assessment of overall significance of expression changes following IL-2 deprivation in gene groups defined by Gene Ontology (GO) categories.

| GO category | GO ontology     | GO term                                                                 | Number of genes | LS permutation p-value | KS permutation p-value | Efron-Tibshirani's GSA test p-value |
|-------------|-----------------|-------------------------------------------------------------------------|-----------------|------------------------|------------------------|-------------------------------------|
| 0004907     | MF <sup>1</sup> | interleukin receptor activity                                           | 41              | 0.00001                | 0.00001                | < 0.005                             |
| 0019955     | MF              | cytokine binding                                                        | 98              | 0.00001                | 0.00001                | < 0.005                             |
| 0019965     | MF              | interleukin binding                                                     | 44              | 0.00001                | 0.0000949              | < 0.005                             |
| 0004896     | MF              | hematopoietin/interferon-class (D200-domain) cytokine receptor activity | 68              | 0.00001                | 0.0000988              | < 0.005                             |
| 0007259     | BP <sup>2</sup> | JAK-STAT cascade                                                        | 52              | 0.00001                | 0.0001056              | < 0.005                             |
| 0006959     | BP              | humoral immune response                                                 | 51              | 0.00001                | 0.0006364              | < 0.005                             |
| 0031060     | BP              | regulation of histone methylation                                       | 10              | 0.00001                | 0.0006694              | < 0.005                             |
| 0051568     | BP              | histone H3-K4 methylation                                               | 10              | 0.00001                | 0.0006694              | < 0.005                             |
| 0032844     | BP              | regulation of homeostatic process                                       | 7               | 0.00001                | 0.0015408              | < 0.005                             |
| 0032845     | BP              | negative regulation of homeostatic process                              | 7               | 0.00001                | 0.0015408              | < 0.005                             |
| 0032847     | BP              | regulation of cellular pH reduction                                     | 7               | 0.00001                | 0.0015408              | < 0.005                             |
| 0048568     | BP              | embryonic organ development                                             | 22              | 0.00001                | 0.001863               | < 0.005                             |
| 0017153     | MF              | sodium:dicarboxylate symporter activity                                 | 9               | 0.00001                | 0.0037804              | < 0.005                             |
| 0005310     | MF              | dicarboxylic acid transmembrane transporter activity                    | 9               | 0.00001                | 0.0037804              | < 0.005                             |
| 0006835     | BP              | dicarboxylic acid transport                                             | 9               | 0.00001                | 0.0037804              | < 0.005                             |
| 0050900     | BP              | leukocyte migration                                                     | 24              | 0.00001                | 0.0047229              | < 0.005                             |
| 0017040     | MF              | ceramidase activity                                                     | 10              | 0.00001                | 0.0049829              | < 0.005                             |
| 0009994     | BP              | oocyte differentiation                                                  | 9               | 0.0001133              | 0.0003659              | < 0.005                             |
| 0048599     | BP              | oocyte development                                                      | 9               | 0.0001133              | 0.0003659              | < 0.005                             |
| 0018212     | BP              | peptidyl-tyrosine modification                                          | 54              | 0.000114               | 0.002013               | < 0.005                             |
| 0051452     | BP              | cellular pH reduction                                                   | 22              | 0.0001582              | 0.0040545              | < 0.005                             |
| 0051453     | BP              | regulation of cellular pH                                               | 22              | 0.0001582              | 0.0040545              | < 0.005                             |
| 0045851     | BP              | pH reduction                                                            | 22              | 0.0001582              | 0.0040545              | < 0.005                             |
| 0051607     | BP              | defense response to virus                                               | 23              | 0.0001833              | 0.0030221              | < 0.005                             |
| 0018108     | BP              | peptidyl-tyrosine phosphorylation                                       | 53              | 0.0001871              | 0.0032075              | < 0.005                             |
| 0048477     | BP              | oogenesis                                                               | 10              | 0.0003763              | 0.0033198              | < 0.005                             |
| 0006672     | BP              | ceramide metabolic process                                              | 43              | 0.0004208              | 0.0030228              | < 0.005                             |
| 0007260     | BP              | tyrosine phosphorylation of STAT protein                                | 19              | 0.0004601              | 0.0046325              | < 0.005                             |
| 0001547     | BP              | antral ovarian follicle growth                                          | 8               | 0.0006383              | 0.0008385              | < 0.005                             |
| 0030218     | BP              | erythrocyte differentiation                                             | 45              | 0.0013289              | 0.00001                | < 0.005                             |
| 0042379     | MF              | chemokine receptor binding                                              | 32              | 0.001562               | 0.0008411              | < 0.005                             |
| 0006665     | BP              | sphingolipid metabolic process                                          | 65              | 0.001942               | 0.0026862              | < 0.005                             |

|         |    |                                                |    |           |           |         |
|---------|----|------------------------------------------------|----|-----------|-----------|---------|
| 0001664 | MF | G-protein-coupled receptor binding             | 37 | 0.0022013 | 0.0003398 | < 0.005 |
| 0048660 | BP | regulation of smooth muscle cell proliferation | 6  | 0.003213  | 0.0021998 | < 0.005 |
| 0048659 | BP | smooth muscle cell proliferation               | 6  | 0.003213  | 0.0021998 | < 0.005 |
| 0031543 | MF | peptidyl-proline dioxygenase activity          | 6  | 0.0032605 | 0.0018536 | < 0.005 |
| 0031545 | MF | peptidyl-proline 4-dioxygenase activity        | 6  | 0.0032605 | 0.0018536 | < 0.005 |
| 0019798 | MF | procollagen-proline dioxygenase activity       | 6  | 0.0032605 | 0.0018536 | < 0.005 |
| 0001541 | BP | ovarian follicle development                   | 15 | 0.0038025 | 0.0009442 | < 0.005 |

---

Three independent tests, LS, KS and Efron-Tibshirani GSA, were applied to select significantly affected gene classes.

<sup>1</sup>MF – Molecular Function

<sup>2</sup>BP – Biological Process
